# Supplementary material for: Ongoing grounding line retreat and fracturing initiated at the Petermann Glacier ice shelf, Greenland, after 2016
Source: Copernicus journal article supplement (doi:10.5194/tc-16-3021-2022), 2022-08-08
Supplement: Supplementary file 1 [file tc-16-3021-2022-supplement.zip]

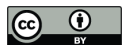

*Supplement of*

## **Ongoing grounding line retreat and fracturing initiated at the Petermann Glacier ice shelf, Greenland, after 2016**

**Romain Millan et al.**

*Correspondence to:* Romain Millan (romi@ign.ku.dk)

- tc-16-3021-2022-supplement-title-page.pdf
- Table\_DATA.xlsx

The copyright of individual parts of the supplement might differ from the article licence.
