# Supplementary material for: Ongoing grounding line retreat and fracturing initiated at the Petermann Glacier ice shelf, Greenland, after 2016
Source: Copernicus journal article supplement (doi:10.5194/tc-16-3021-2022), 2022-08-08
Supplement: Supplementary file 2 [file tc-16-3021-2022-supplement.zip]

Archive with 2 entries (2 files):
- tc-16-3021-2022-supplement-title-page.pdf
- Table_DATA.xlsx
